# Supplementary material
Source: Springer Nature journal article supplement (https://www.springermedizin.de/resource/supplementary/12936_2007_361_MOESM3_ESM.pdf/9547640)

Lethal concentrations  
of PP ( $\times 10^{-3}$  ul/cm<sup>2</sup>)

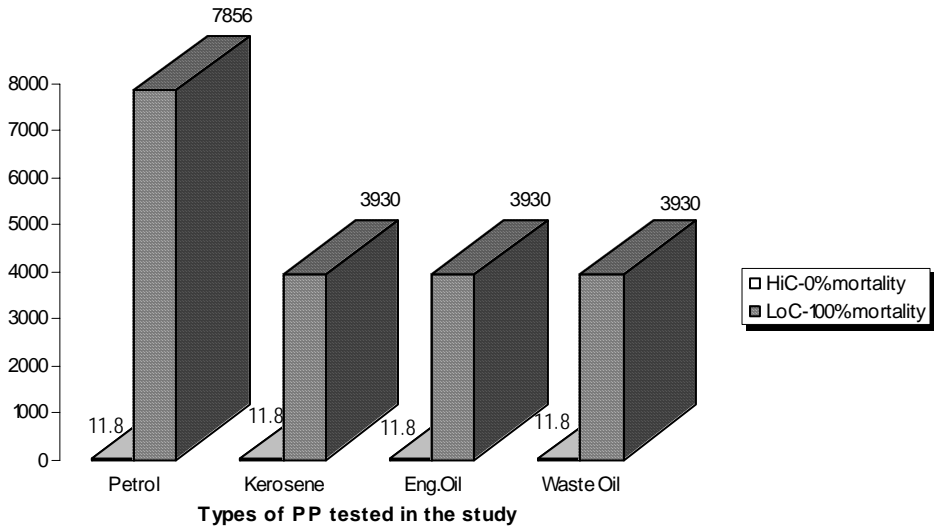

Supplement: MOESM3 [file 9547640]
